# Supplementary material for: A constitutive active allele of the transcription factor Msn2 mimicking low PKA activity dictates metabolic remodeling in yeast
Source: PubMed Central journal article supplement — Mol Biol Cell. 2018 Nov 15;29(23):2848–62. doi: 10.1091/mbc.E18-06-0389 (PMC6249869; doi:10.1091/mbc.e18-06-0389), 2018-11-15
Supplement: mbc-29-2848-s001.pdf [file mbc-29-2848-s001.pdf]

# Supplemental Materials

*Molecular Biology of the Cell*

Pfanzagl et al.

**Figure S1.** Domains of Msn2 related proteins. Selected parts of a multiple sequence alignment of the identified Msn2 and Msn4 homologues shows the conservation of the 4 domains and the consensus sequence.

**Figure S2.** Multiple sequence alignment of 22 protein sequences related to *Saccharomyces cerevisiae* Msn2 and Msn4.

**Figure S3.** Localization effects of Msn2 phosphomimetic mutations. (A) W303 *msn2Δmsn4Δ* cells expressing either Msn2A5-GFP or Msn2D5-GFP were exposed glucose starvation and different stress conditions. Pictures were taken 10 minutes after induction. (B) W303 *msn2Δmsn4Δcdc35Δpde2Δ* cells expressing either Msn2D5-GFP or Msn2D6-GFP were grown in presence of 3mM cAMP to exponential phase and shifted to medium lacking cAMP. PKA activity was re-induced by addition of 3mM cAMP.

**Figure S4.** mRNA level changes of genes encoding key enzymes of the (A) glycolysis gluconeogenesis, and (B) pentosephosphate cycle. Log<sub>2</sub> values of expression change are indicated.

**Figure S5.** The Msn2A6 expression profile resembles glucose-starved cells. The expanded compendium shows distinct expression pattern signatures for mutants similar to high and low glucose growth.

**Data file S1.** Sheet Expression levels: Gene expression changes induced by Msn2A6 after 90 minutes induction of expression by 17-β-estradiol addition (6nM). Selected fold change (log<sub>2</sub>) and signal difference values of up and downregulated genes are listed. Sheet Carbon Pathways: Expression levels of genes of the primary carbon and energy pathways as derived from KEGG database (<https://www.genome.jp/kegg/pathway.html>)

**Data file S2.** Values to reconstruct the heatmap of Figure 3 and Figure S4 for visualization with treeview.

**Data file S3.** Data of metabolite measurements.

**Data file S4.**List of protein sequences used for multiple sequence alignment

**Data file S5.**Multiple sequence alignment of *Saccharomyces cerevisiae* Msn2

Figure S1

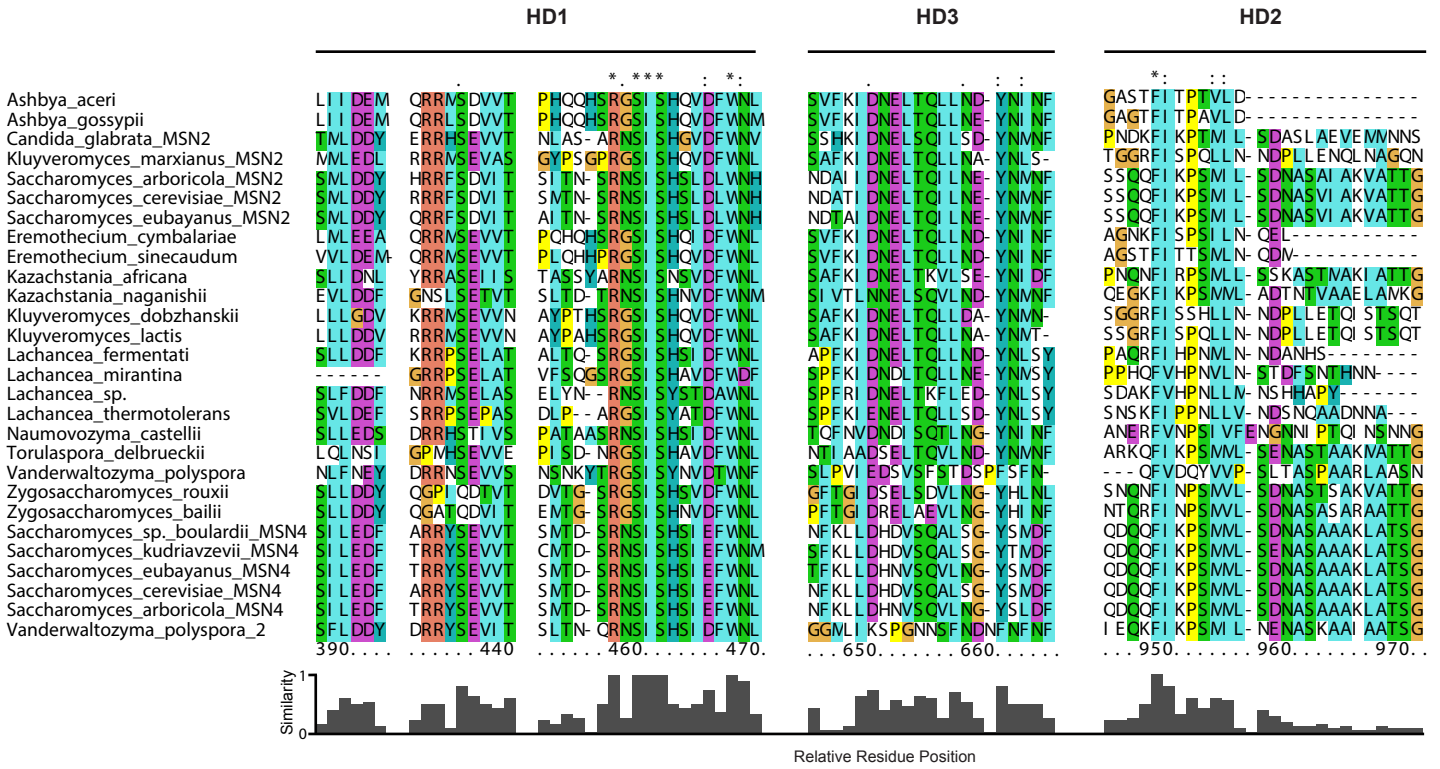

Zinc finger

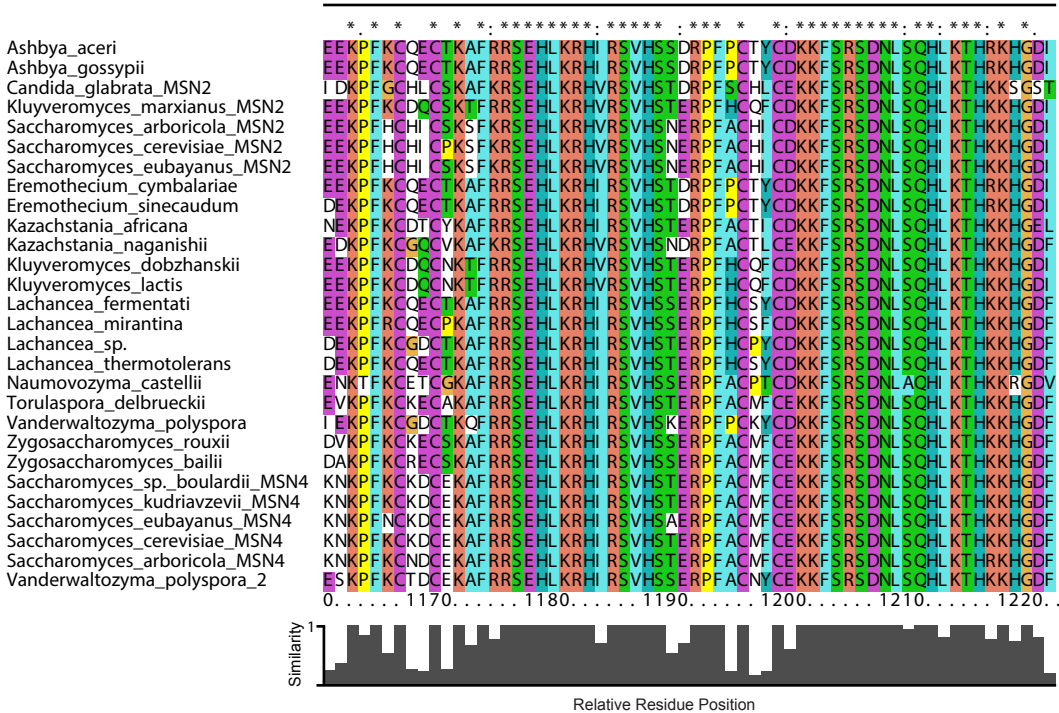







Ashbya\_aceri  
Ashbya\_gossypii  
Candida\_glabrata\_MSN2  
Kluyveromyces\_marxiannus\_MSN2  
Saccharomyces\_cerevisiae\_MSN2  
Saccharomyces\_eubayanus\_MSN2  
Saccharomyces\_eubayanus\_MSN2  
Eremothecium\_gubbiarum  
Eremothecium\_gubbiarum  
Kazachstaniana\_nagantshii  
Kluyveromyces\_dobzhanskyi  
Kluyveromyces\_lactis  
Lachancea\_fermentati  
Lachancea\_mitrantina  
Lachancea\_sp.  
Namuvorzyma\_castellii  
Torula\_spor\_deltuberculii  
Zygosaccharomyces\_baillii  
Zygosaccharomyces\_baillii  
Zygosaccharomyces\_kudriavzevii\_MSN4  
Saccharomyces\_eubayanus\_MSN4  
Saccharomyces\_cerevisiae\_MSN4  
Saccharomyces\_arboricola\_MSN4  
Vanderwaltozyma\_polyspora\_2

1060 ..... 1070 ..... 1080 ..... 1090 ..... 1100 ..... 1120 ..... 1130 ..... 1140 ..... 1150 ..... 1160 ..... 1170 ..... 1180 ..... 1190 ..... 1200

Ashbya\_aceri  
Ashbya\_gossypii  
Candida\_glabrata\_MSN2  
Kluyveromyces\_marxiannus\_MSN2  
Saccharomyces\_arboricola\_MSN2  
Saccharomyces\_eubayanus\_MSN2  
Saccharomyces\_eubayanus\_MSN2  
Eremothecium\_gubbiarum  
Eremothecium\_gubbiarum  
Kazachstaniana\_nagantshii  
Kluyveromyces\_dobzhanskyi  
Kluyveromyces\_lactis  
Lachancea\_fermentati  
Lachancea\_mitrantina  
Lachancea\_sp.  
Namuvorzyma\_castellii  
Torula\_spor\_deltuberculii  
Zygosaccharomyces\_baillii  
Zygosaccharomyces\_baillii  
Zygosaccharomyces\_kudriavzevii\_MSN4  
Saccharomyces\_eubayanus\_MSN4  
Saccharomyces\_cerevisiae\_MSN4  
Saccharomyces\_arboricola\_MSN4  
Vanderwaltozyma\_polyspora\_2

1060 ..... 1070 ..... 1080 ..... 1090 ..... 1100 ..... 1120 ..... 1130 ..... 1140 ..... 1150 ..... 1160 ..... 1170 ..... 1180 ..... 1190 ..... 1200

..... 1060 ..... 1070 ..... 1080 ..... 1090 ..... 1100 ..... 1120 ..... 1130 ..... 1140 ..... 1150 ..... 1160 ..... 1170 ..... 1180 ..... 1190 ..... 1200





Figure S3

A

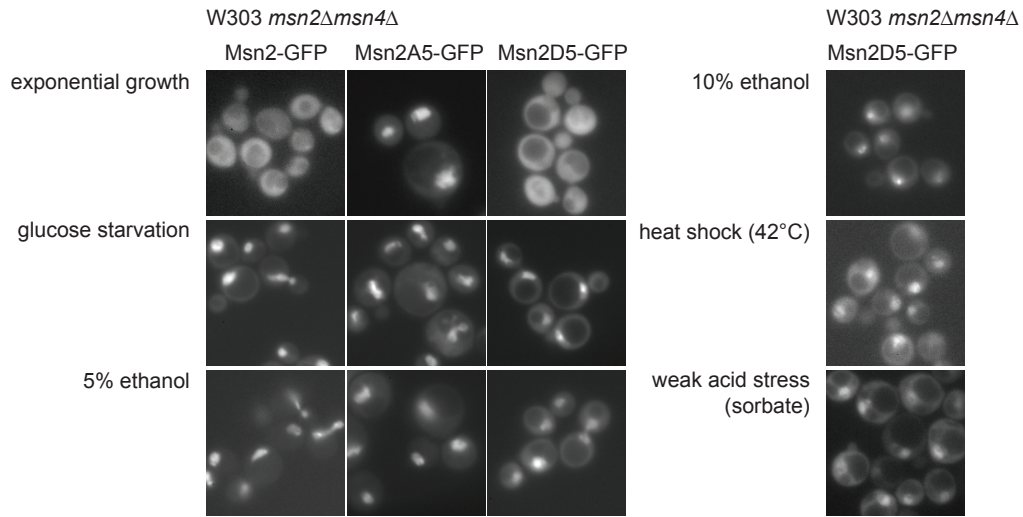

B

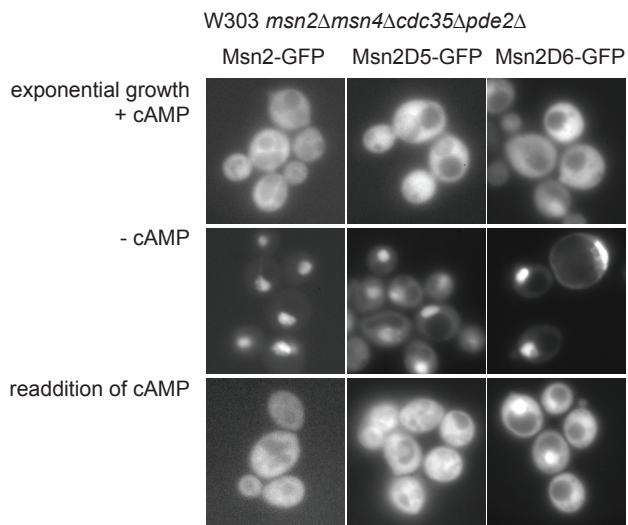

Figure S4

A

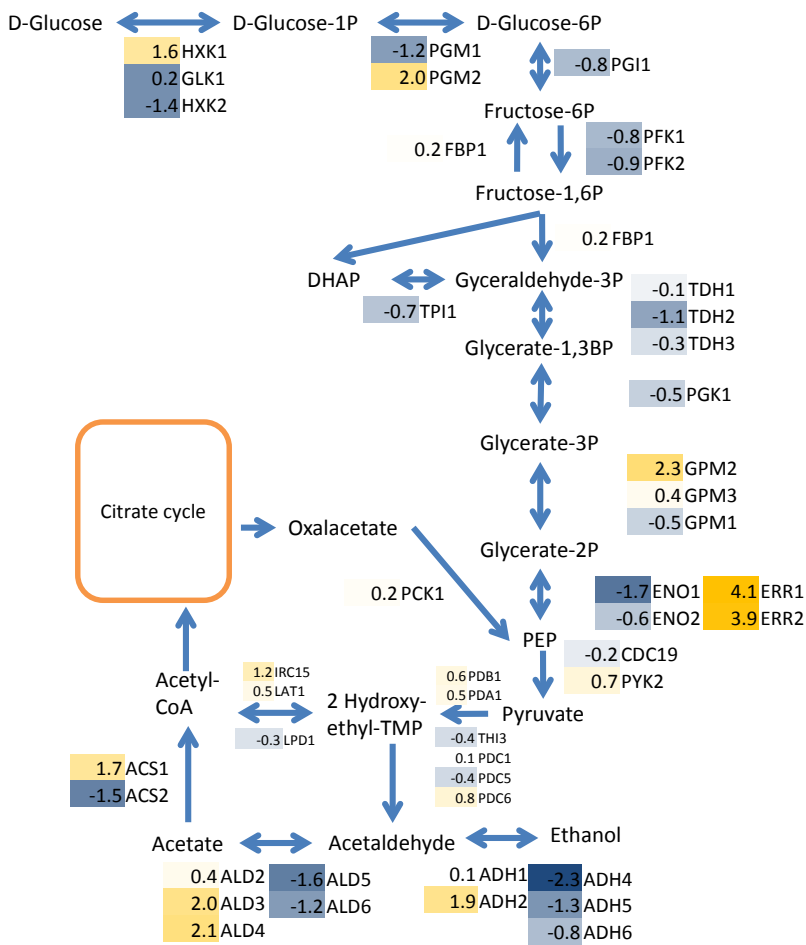

B

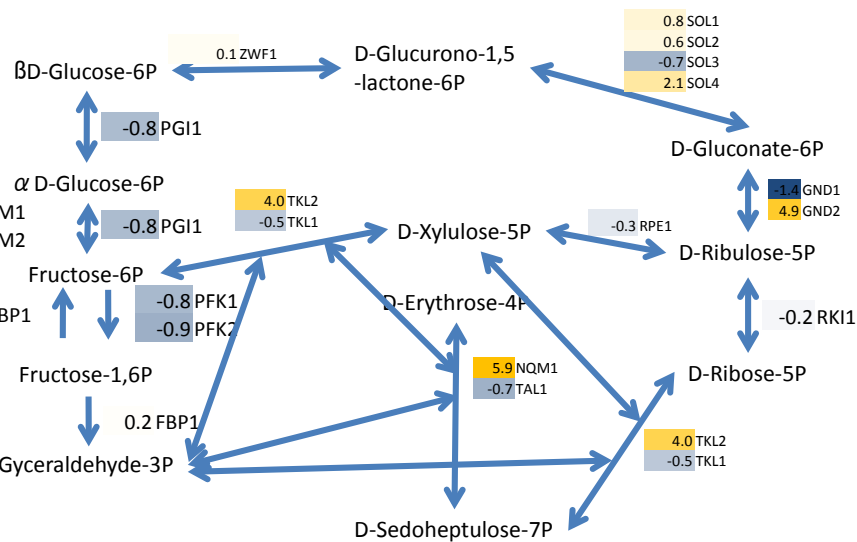

Figure S5

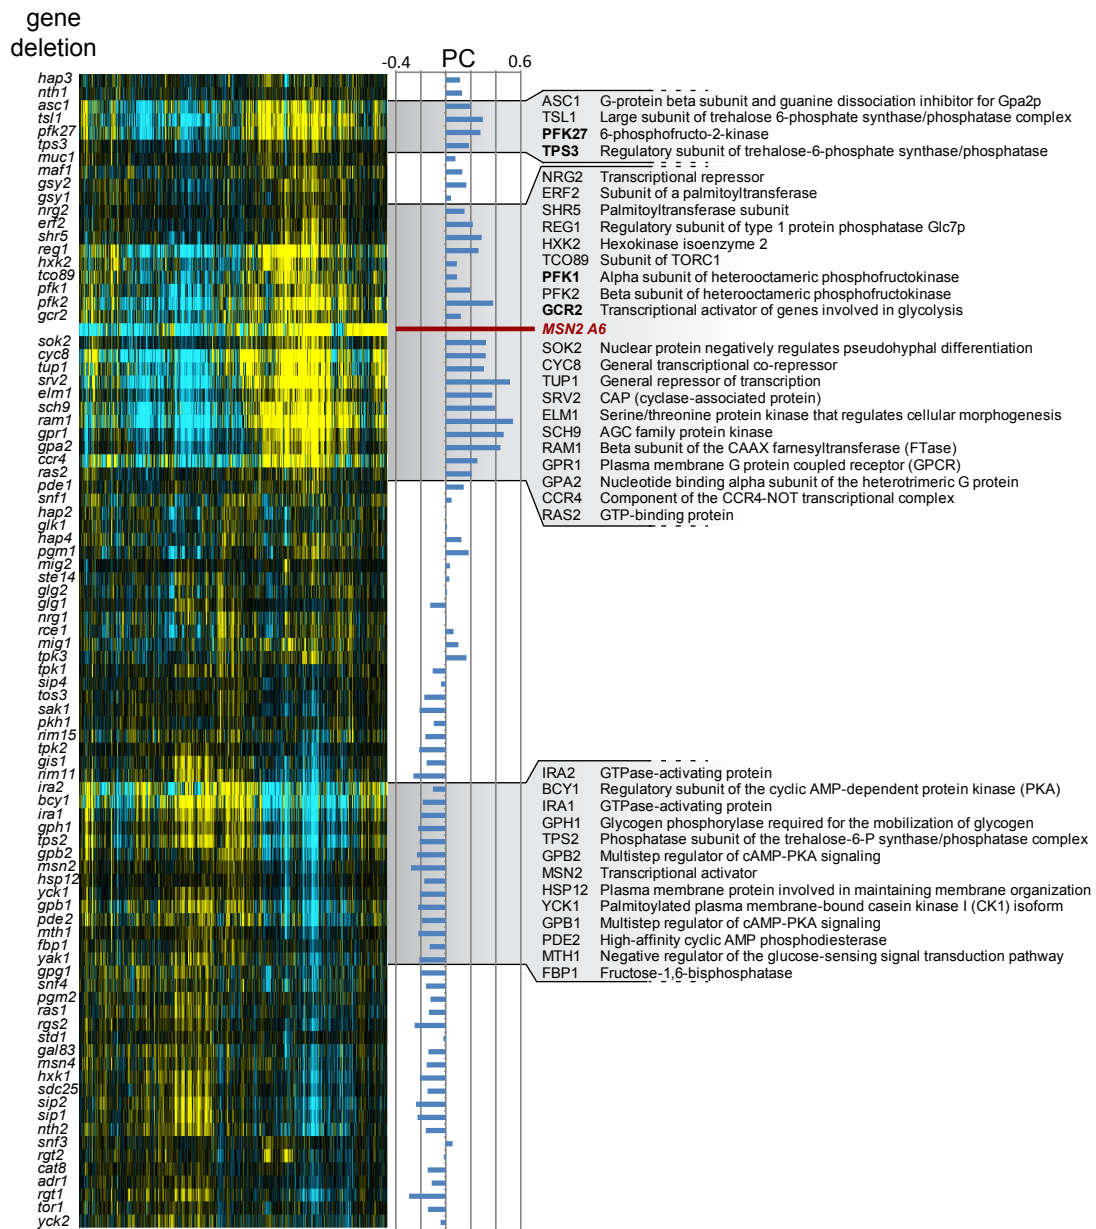

Uniprot ID for protein sequences similar to ScMsn2

R9X9G1  
Q75DD8  
Q6FU62  
W0TE20  
J8PK04  
A2Q129  
A0A0L8RDU3  
G8JQ41  
A0A120K2A0  
H2AMS0  
J7S9G1  
A0A0A8LDU0  
Q6CIG0  
A0A1G4MF34  
A0A1G4J958  
A0A1G4IX78  
C5DGW1  
G0V8Q0  
G8ZQC6  
A7TH69  
C5DWZ7  
CDH11741.1  
A0A0L8VLY4  
J6EQA0  
A0A0L8RFN9  
P33749  
J8LLC8  
A7TTK9

**Table S2:** Oligonucleotides used in the study.

| Name | sequence                                                                           |
|------|------------------------------------------------------------------------------------|
| O6   | 5`-TGGCCGTTTACGGTCGACCATG-3`                                                       |
| O18  | 5`-GATGATGATGTCGACACTAA TTTATCACGCCG-3`,                                           |
| O19  | 5`-GTCGA CGTTTCTAGTGATCTCTTATTG-3`,                                                |
| O4   | 5`-AGCCATGGT ATGGTGACCCTGCTGTGGG-3`.                                               |
| O12  | 5`-TTTGGATCCTTCCTCTGTCA AAAATGGC-3`                                                |
| O13  | 5`-AAAGGATCCAAAATCGGTTC TTCCCTTCGG-3`                                              |
| O1   | 5`-CTAAAATGACGGTCGACCATG-3`                                                        |
| O15  | 5`-TTTGGATCCTATGGTAGCGT CATTGTTTTTCGGG-3`                                          |
| O16  | 5`-TTTGGATCCCGTAGAATTGGAGTTT GAATTAGAAATGGAG-3`                                    |
| O17  | 5`TTTGAATTCCTATTGCTTGGATTAATTTTCGGATGGTTCCAAAGGT<br>CCAAAGAGTGAGAAATAGAGTTCCTCG-3` |
